# Supplementary material
Source: publisher site journal article supplement (https://www.dovepress.com/article/372420)
Supplement: Supplementary file 1 [file get_supplementary_file.php]

**Supplementary Table 1** Primer sequences.

|  | Name | Forward | Reverse |
| --- | --- | --- | --- |
| mRNA | β-actin | GGCCTCCAAGGAGTAAGACC | AGGGGTCTACATGGCAACTG |
| TRIM32 | TGATGAGGAGGAGCCAGAGC | AGAGGTAGAGGCAGCAGACG |
| AAK1 | AGCGCCACCAACAAATTCCA | AGCCCAAATGTCTGCCTTCG |
| TSPAN14 | TTGTGGCTGGCGTCTTCATC | GCCTTCACTGCCTCGATGTC |
| MSI2 | GCAGACCTCACCAGATAGCC | GCCTCTGGAGCGTTTCGTAG |
| ETS1 | GTTGTGATCGCCTCACCCAG | GCAGCAGGAATGACAGGCTT |
| LIFR | ACCTGGTCTTGCGAGCCTAT | ACAATGACAGCCACTGCCAC |
| BCL2 | GGTCATGTGTGTGGAGAGCG | TCCCAGCCTCCGTTATCCTG |
| CDH5 | ATCCAGGCAGTGGTAGCCAT | TCGTAGCTGGTGGTGTCCAT |
| SUV39H1 | GCGCCACCTACCTCTTTGAC | CCGGATGGTTCTTGTGGCAA |
| STAT3 | CCTGTGGGAAGAATCACGCC | GGACATCCTGAAGGTGCTGC |
| TET2 | CAGCAGCAAACACAGCAACC | TGTGGCTTGCATCCAGGTTC |
| DRAM2 | TGTGGTGGTTTCAGCAAGGC | AGCCGGGTCTATATGGTGGAG |
| miRNA | hsa-U6 | GTGCTCGCTTCGGCAGCACATATAC |  |
| hsa-miR-16-5p | GCTAGCAGCACGTAAATATTGGCG |  |
| hsa-miR-21-3p | CAACACCAGTCGATGGGCTGT |  |
| hsa-miR-24-3p | TGGCTCAGTTCAGCAGGAACAG |  |
| hsa-miR-27a-3p | CCTTCACAGTGGCTAAGTTCCGC |  |
| hsa-miR-27b-3p | ACGGAACTTCACAGTGGCTAA |  |
| hsa-miR-29a-3p | AACCTCCTAGCACCATCTGAAA |  |
| hsa-miR-92a-3p | ACGGTATATATTGCACTTGTCCC |  |
| hsa-miR-125a-5p | AAGCTTATCCCTGAGACCCTTTA |  |
| hsa-miR-125b-5p | AATGCTTTCCCTGAGACCCTAA |  |
| hsa-miR-142-3p | AACCGGTGTAGTGTTTCCTACT |  |
| hsa-miR-142-5p | GCGCCATAAAGTAGAAAGCACTACT |  |
| hsa-miR-146a-3p | ACATTGGCCCTCTGAAATTCAG |  |
| hsa-miR-148a-3p | AACCGGTCAGTGCACTACAG |  |
| hsa-miR-148a-5p | ACACTACGAAAGTTCTGAGACAC |  |
| hsa-miR-150-5p | ACGACGTCTCCCAACCCTT |  |
| hsa-miR-155-5p | AAGCGCCTTTAATGCTAATCGT |  |
| hsa-miR-181a-5p | AACCTCCAACATTCAACGCTG |  |
| hsa-miR-221-3p | AAGCGCCTAGCTACATTGTCT |  |
| hsa-miR-222-3p | AGGCTATCAGCTACATCTGGC |  |
| hsa-miR-223-3p | AAGAGCGTTGTCAGTTTGTCAA |  |
| hsa-miR-451a | CCGAAACCGTTACCATTACTGAGTT |  |
| hsa-miR-486-5p | TTGTACTGAGCTGCCCCGAG |  |

**Supplementary Table 2** ANOVA for U6 Ct values in four groups.

| variable | Groups (mean ± standard deviation) | | | | F | P  Value |
| --- | --- | --- | --- | --- | --- | --- |
| 3(n=16) | 2(n=16) | 1(n=16) | 0(n=16) |
| Ct value | 22.488±0.915 | 22.338±0.841 | 22.516±0.951 | 22.907±0.611 | 1.336 | 0.271 |

**Notes:** 0: Control, 1: Recovery, 2: Turn negative, 3: Acute
